# Supplementary material
Source: MDPI journal article supplement (https://www.mdpi.com/2218-0532/91/2/26)
Supplement: s1 [file s1]

## Supplementary information

**Supplementary data:** The  $^1\text{H}$ ,  $^{13}\text{C}$  NMR and LC-MS spectra of compounds **8 a-g**

### Table of Contents

Copies of  $^1\text{H}$ ,  $^{13}\text{C}$  NMR and LC-MS spectra of compounds **8 a-g** .....S1-21

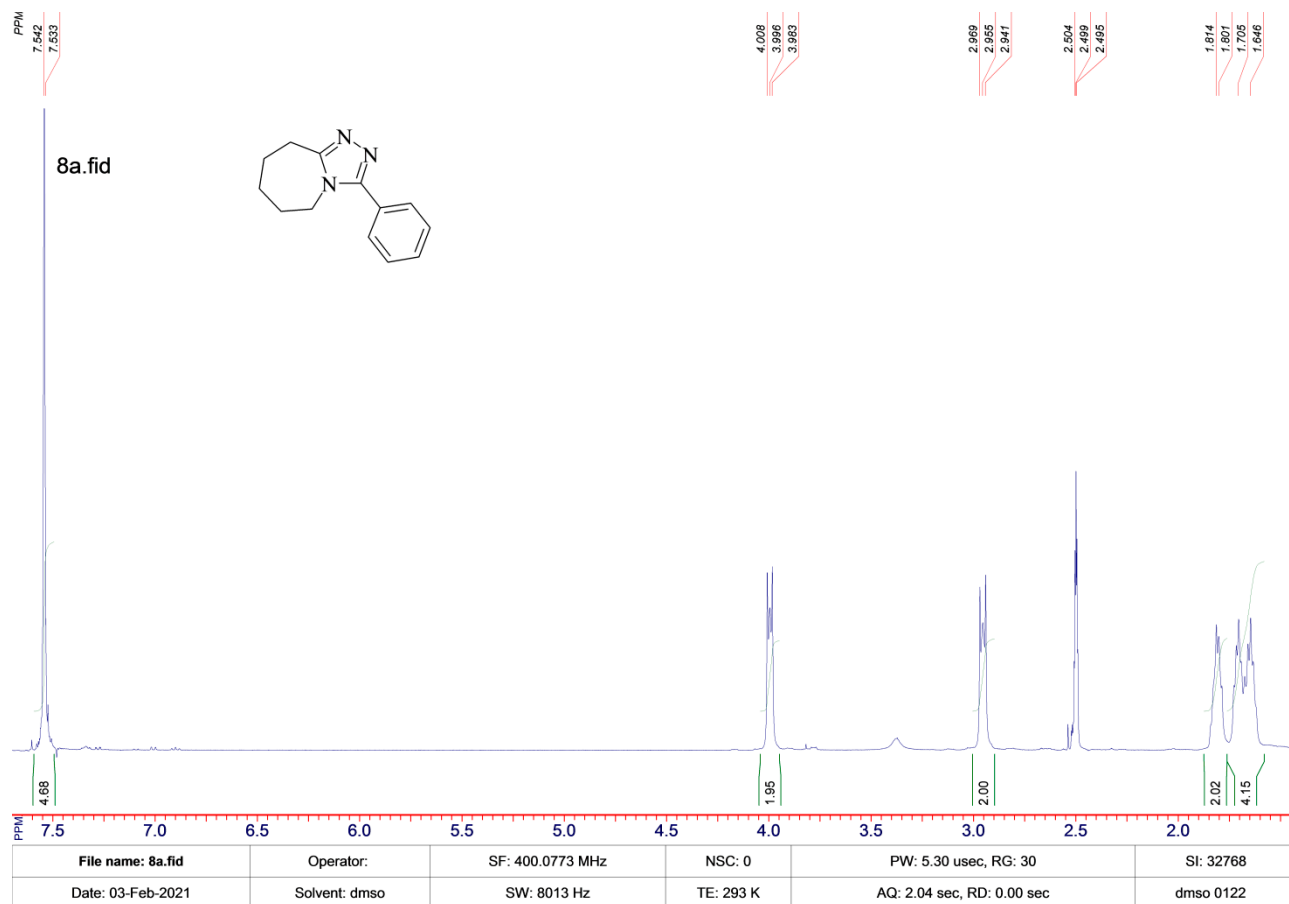

Figure S1.  $^1\text{H}$  NMR spectrum of compound **8a**

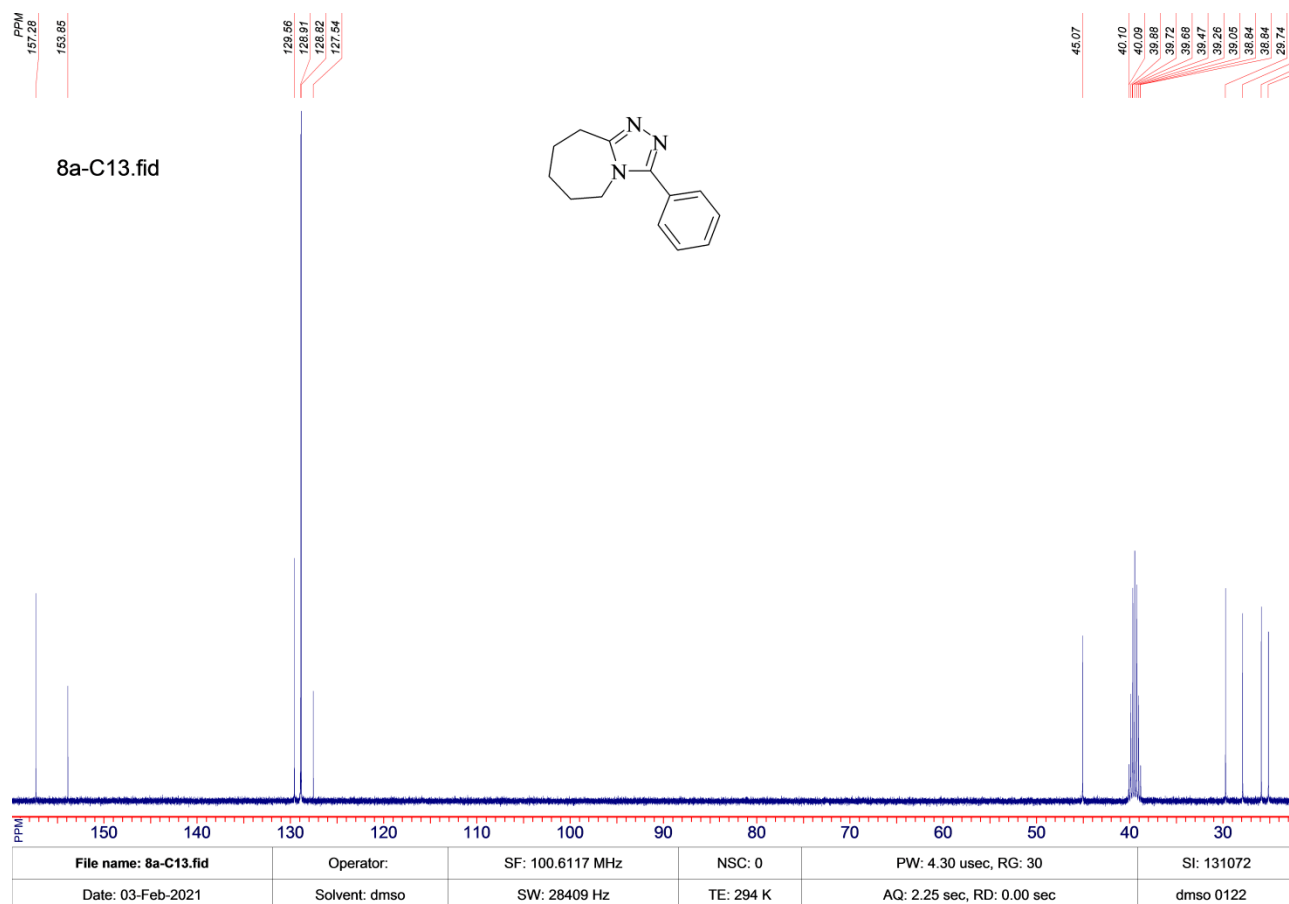

Figure S2.  $^{13}\text{C}$  NMR spectrum of compound **8a**

MaxPeak: 100.00%  
Ret\_Time: 0.933 min

Mol Wt  
Exact Mass  
# Time Area%

| # | Time  | Area%  |
|---|-------|--------|
| 1 | 0.933 | 100.00 |

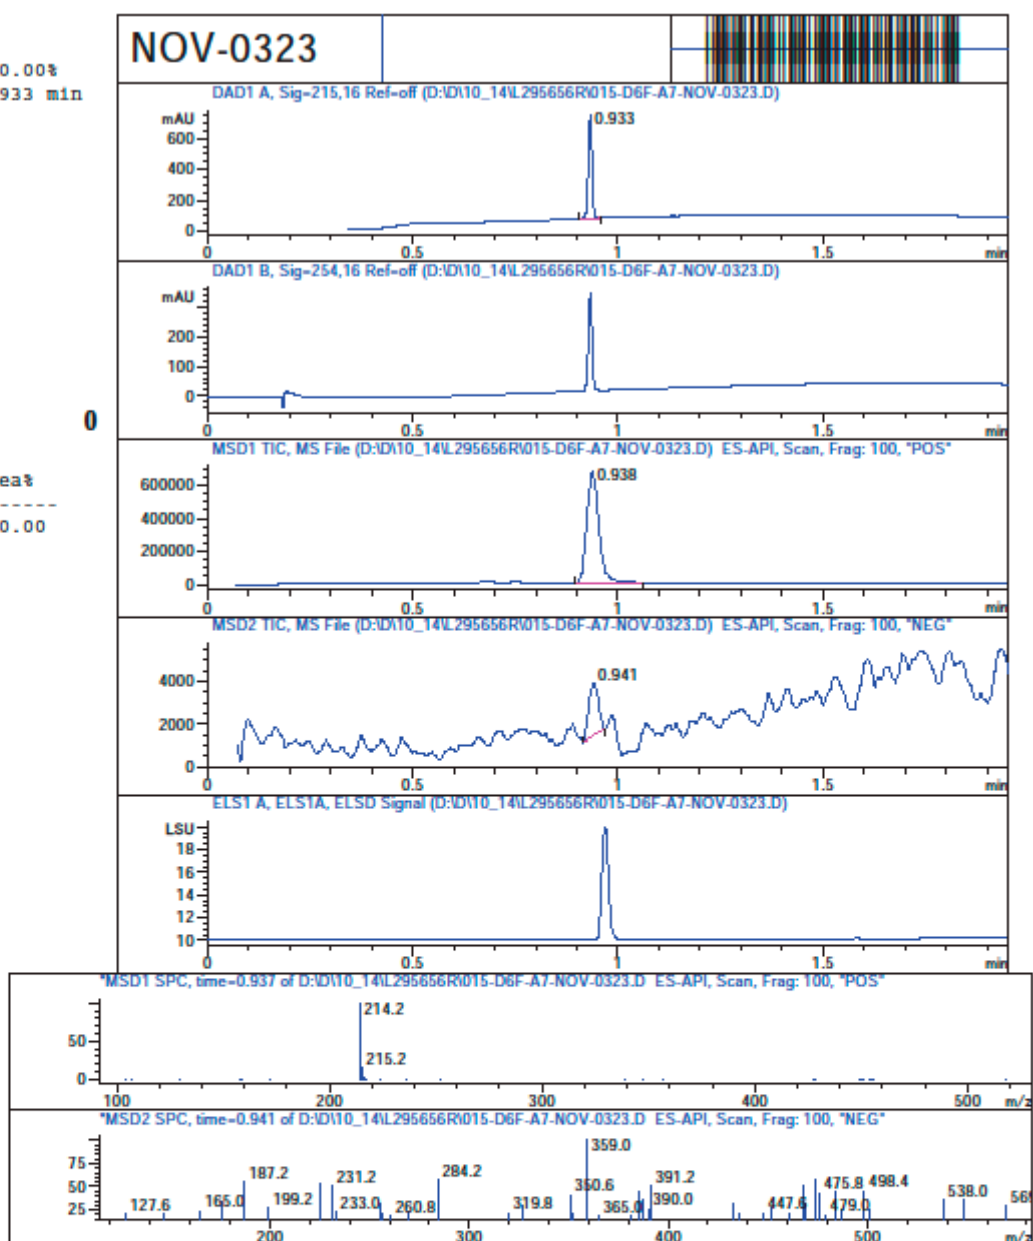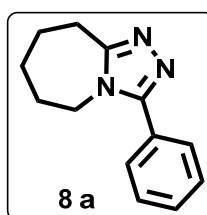

Molecular Weight:  
213,28

Figure S3. LC-MS spectrum of compound **8a**

8b.fid

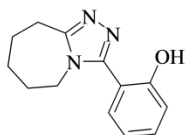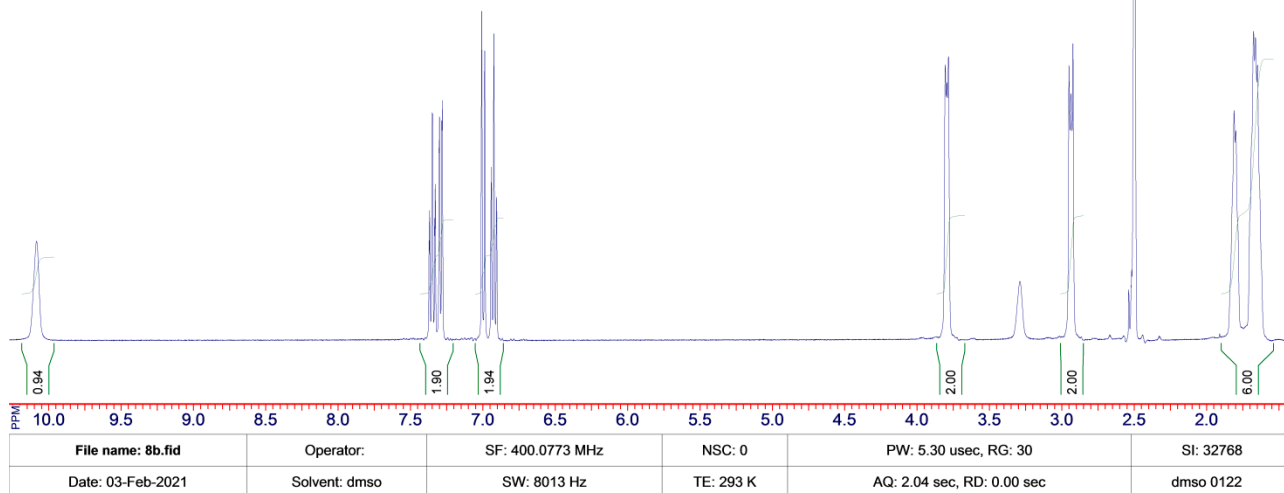

Figure S4.  $^1\text{H}$  NMR spectrum of compound **8b**

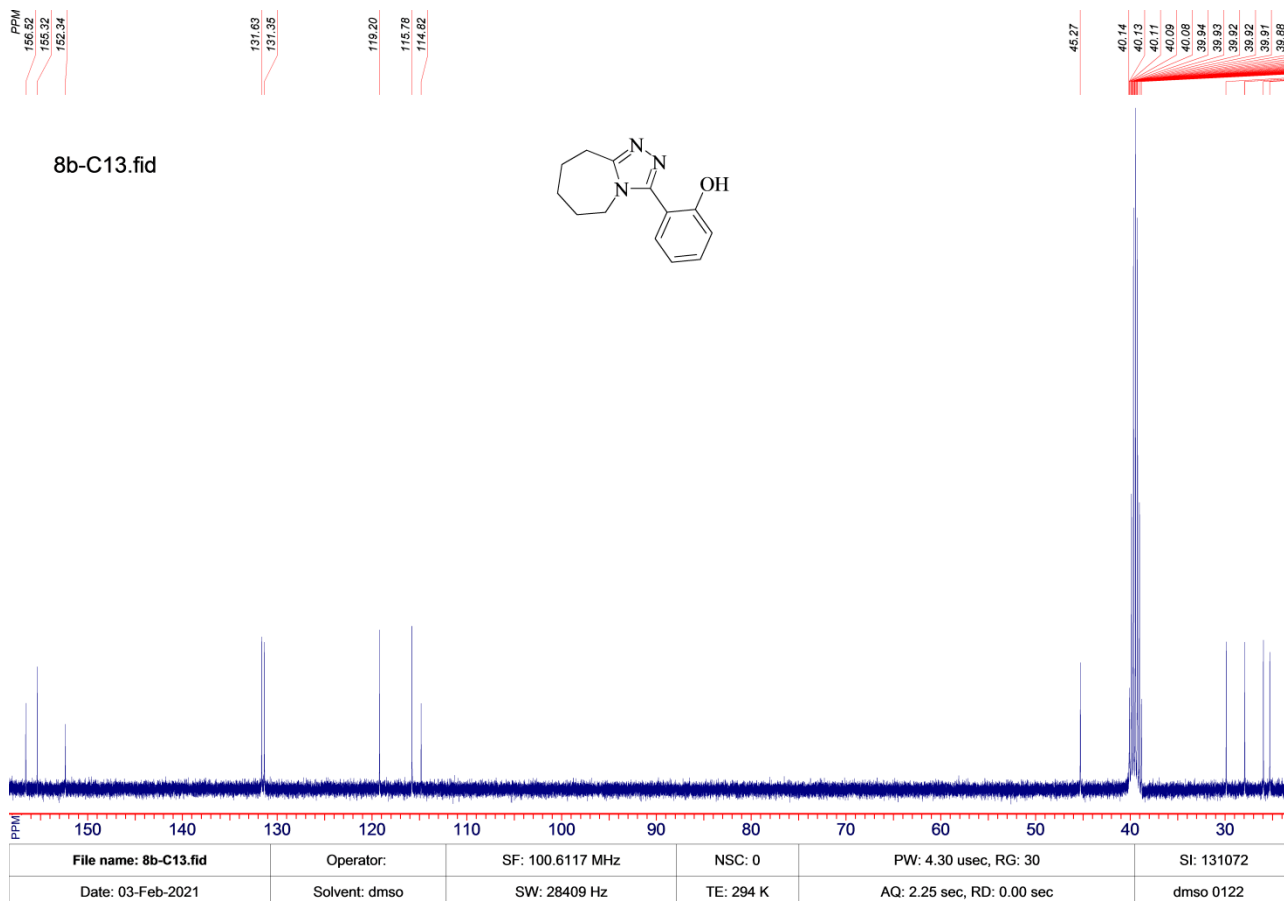

Figure S5.  $^{13}\text{C}$  NMR spectrum of compound **8b**

MaxPeak: 100.00%  
Ret\_Time: 0.814 min

Mol Wt  
Exact Mass  
# Time Area%

| # | Time  | Area%  |
|---|-------|--------|
| 1 | 0.814 | 100.00 |

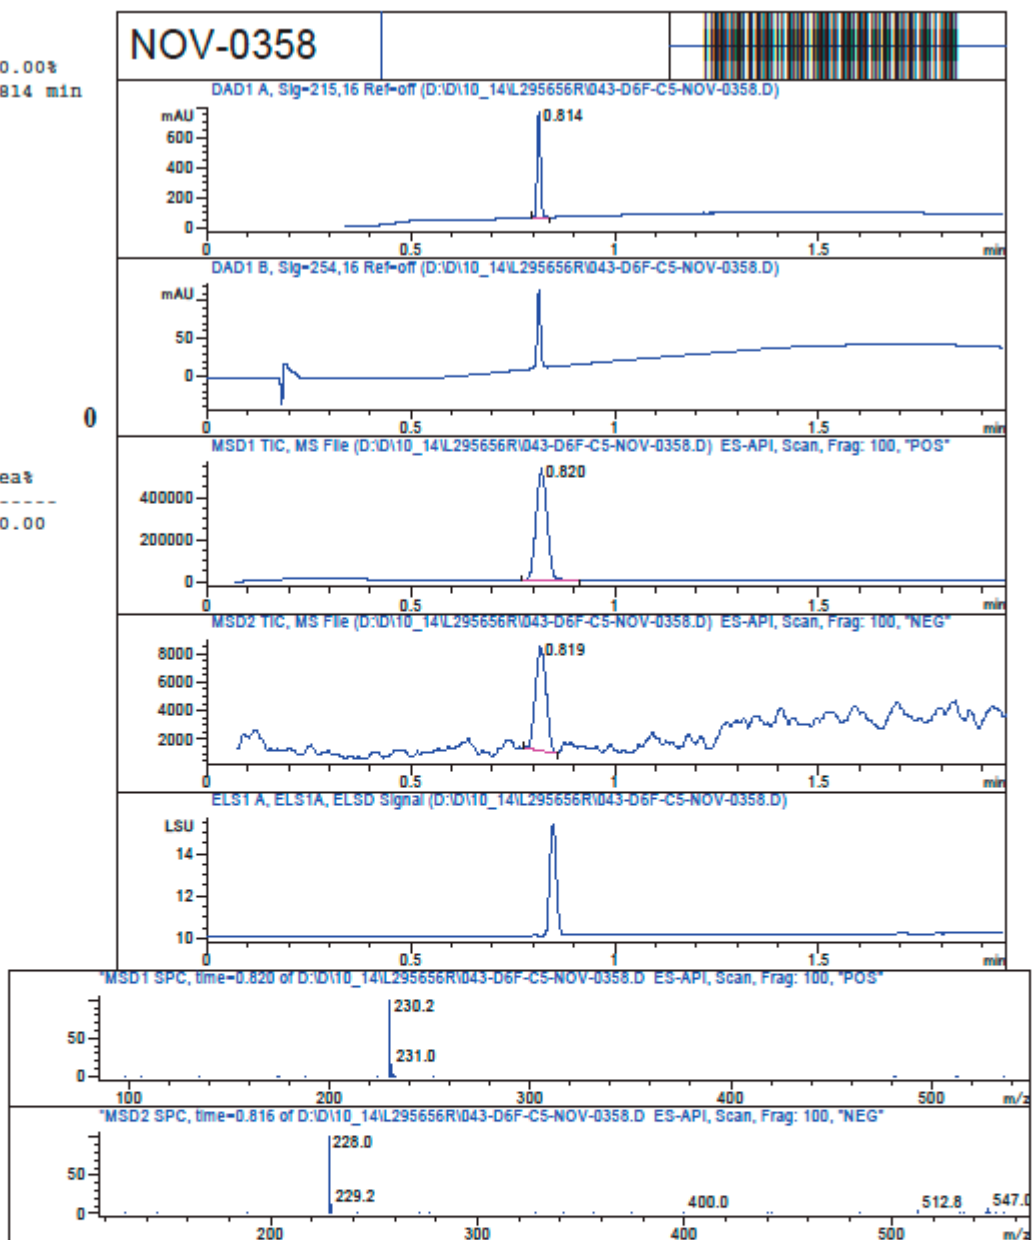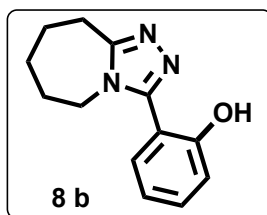

Molecular Weight: 229,28

Figure S6. LC-MS spectrum of compound **8b**

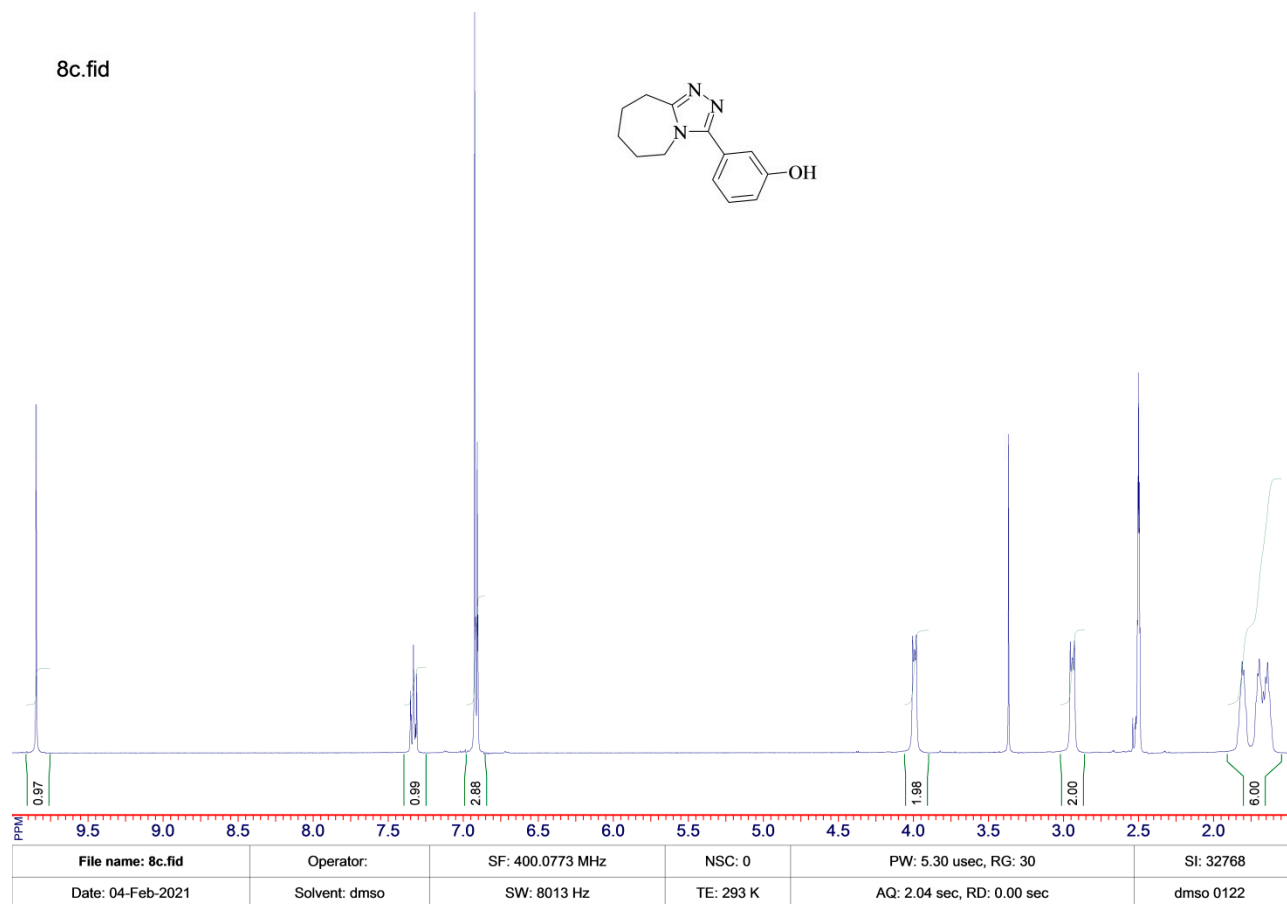

Figure S7.  $^1\text{H}$  NMR spectrum of compound **8c**

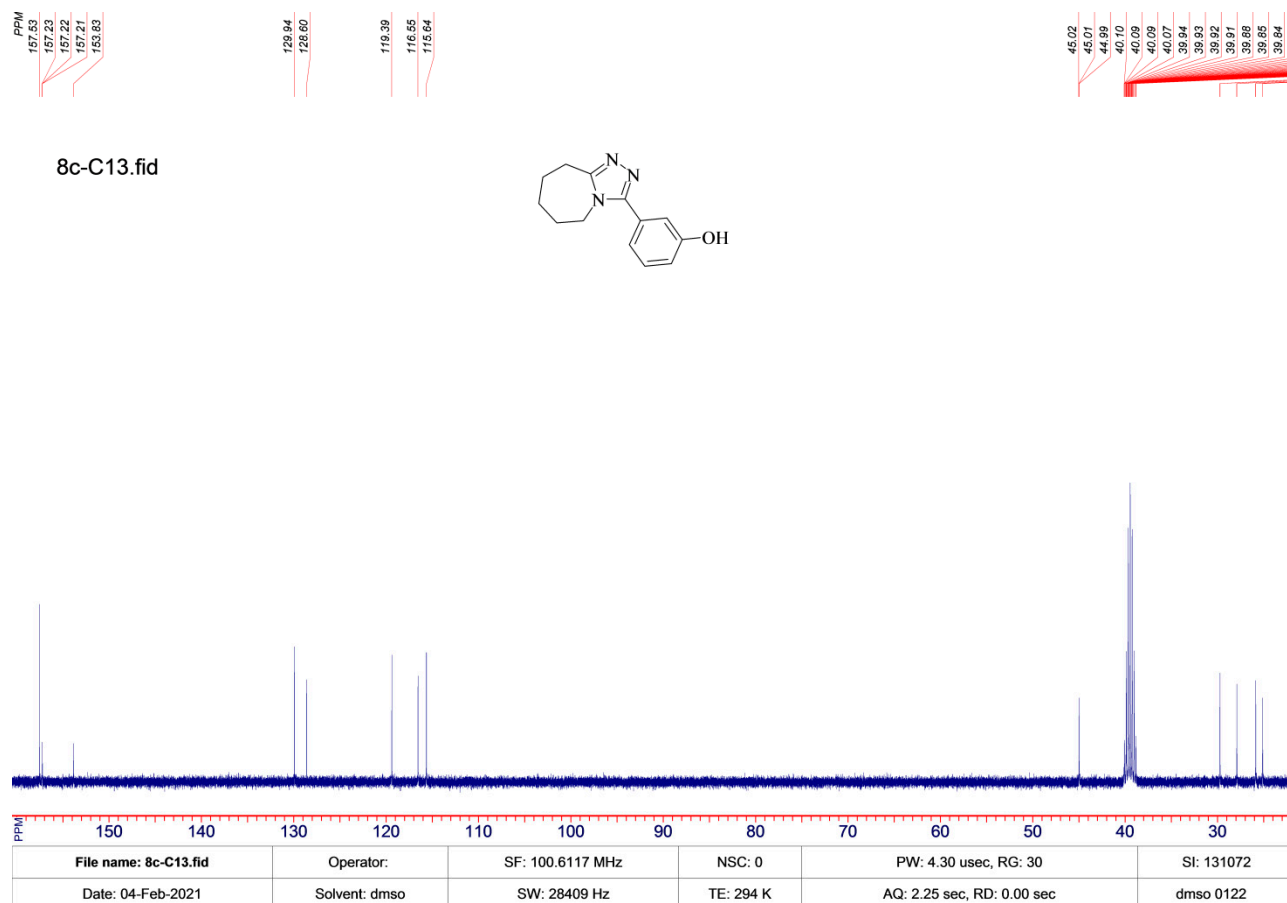

Figure S8.  $^{13}\text{C}$  NMR spectrum of compound **8c**

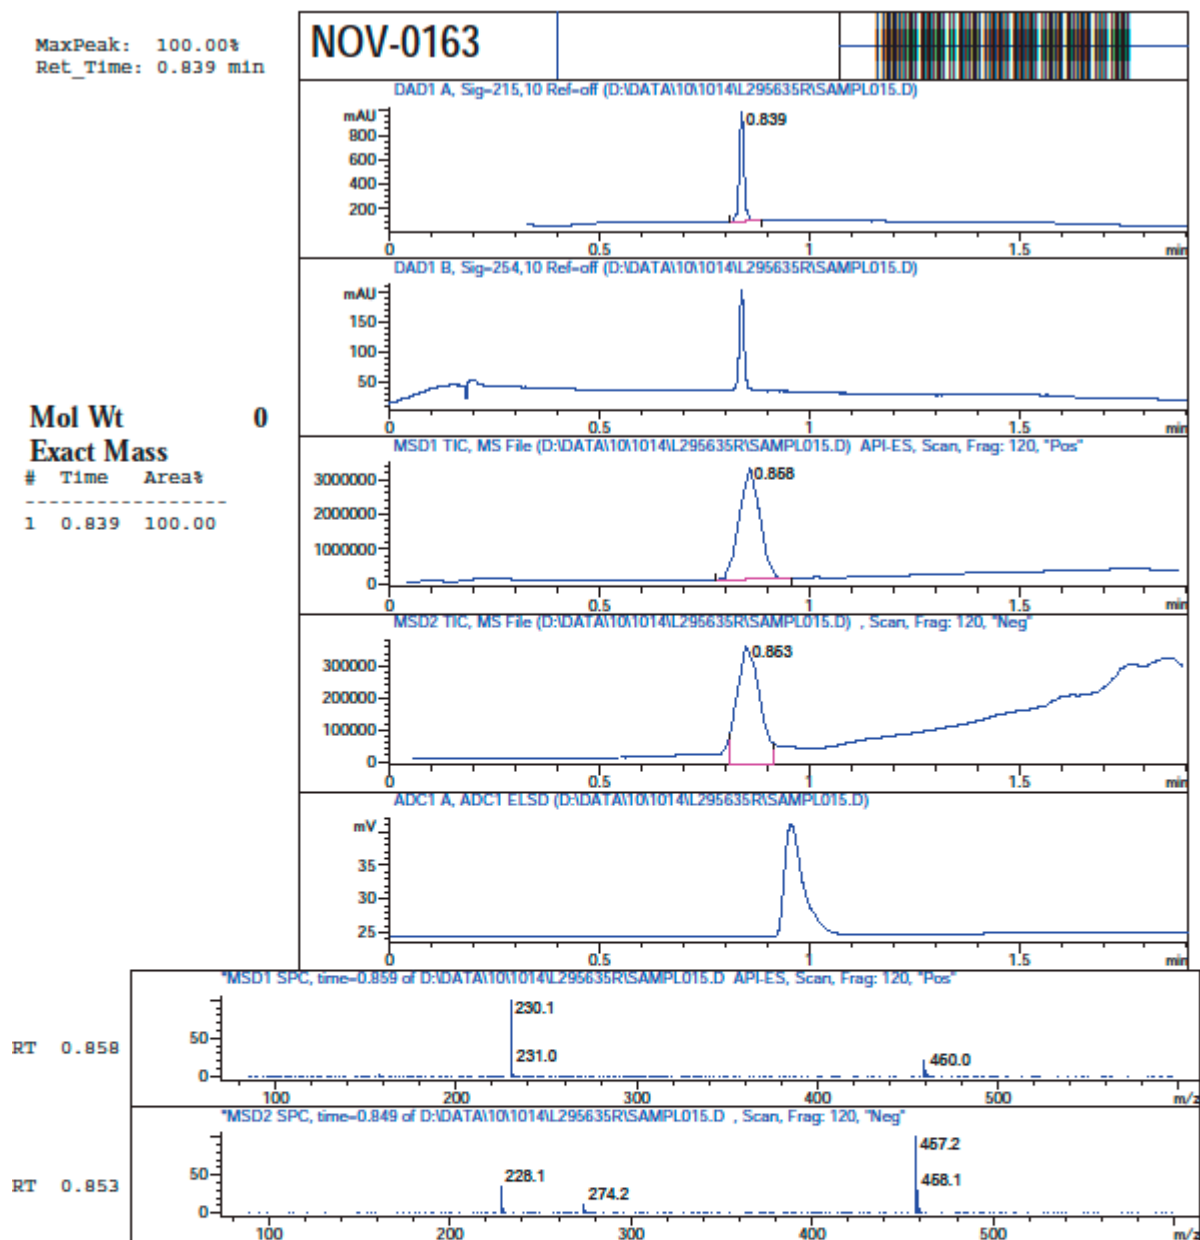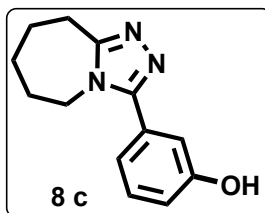

Molecular Weight: 229,28

Figure S9. LC-MS spectrum of compound **8c**

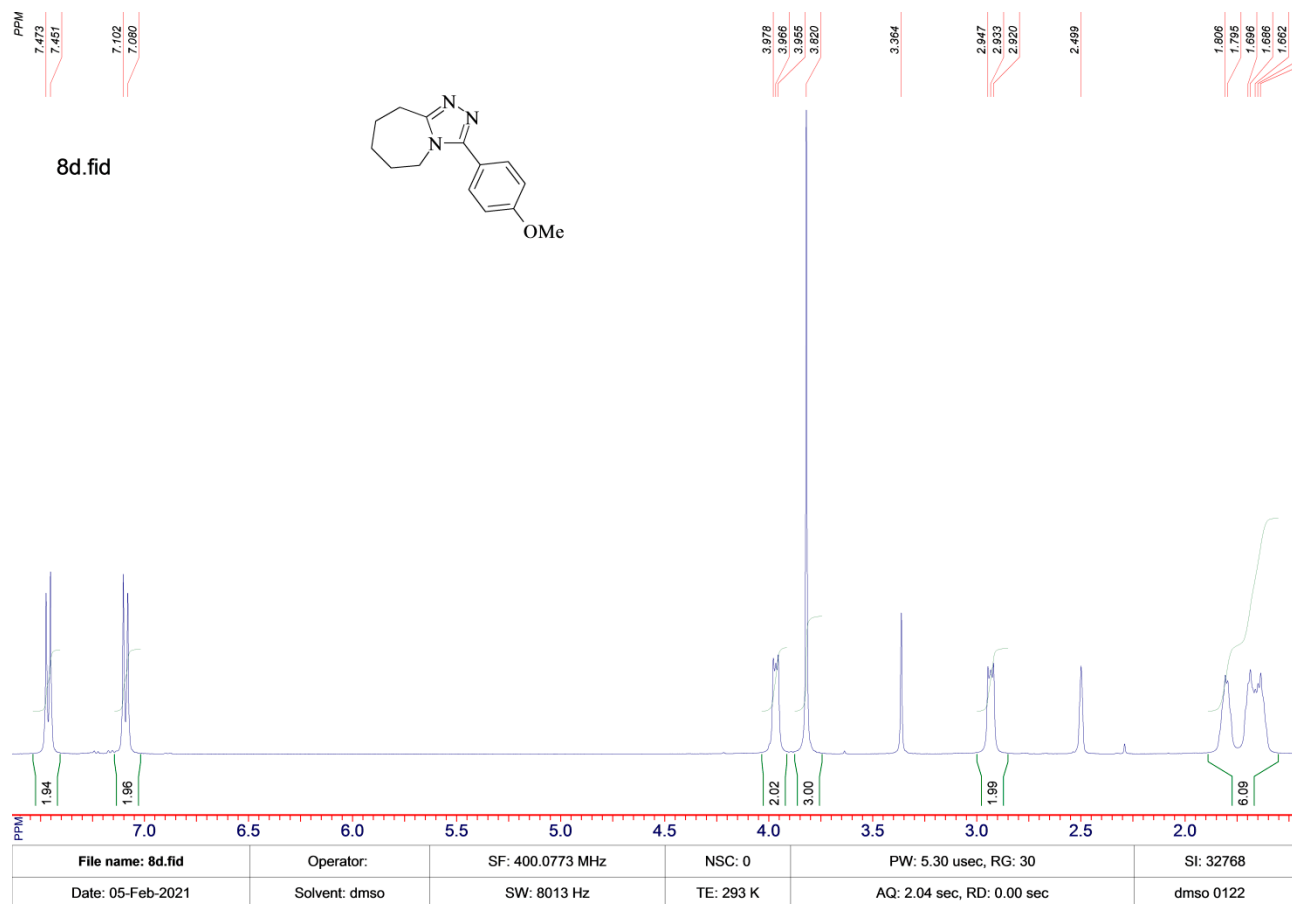

Figure S10.  $^1\text{H}$  NMR spectrum of compound **8d**

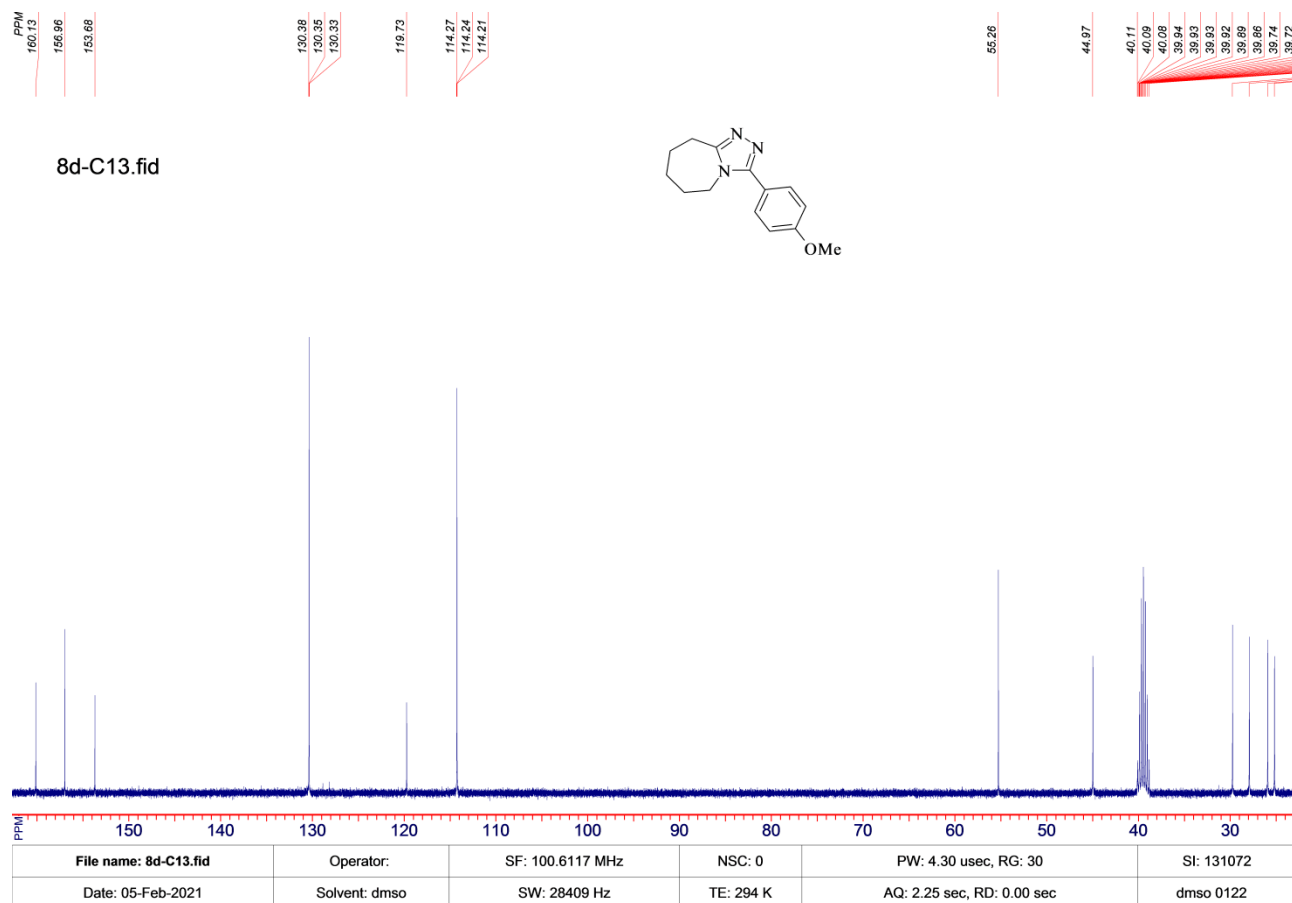

Figure S11.  $^{13}\text{C}$  NMR spectrum of compound **8d**

MaxPeak: 100.00%  
Ret\_Time: 0.936 min

Mol Wt  
Exact Mass  
# Time Area%

| # | Time  | Area%  |
|---|-------|--------|
| 1 | 0.936 | 100.00 |

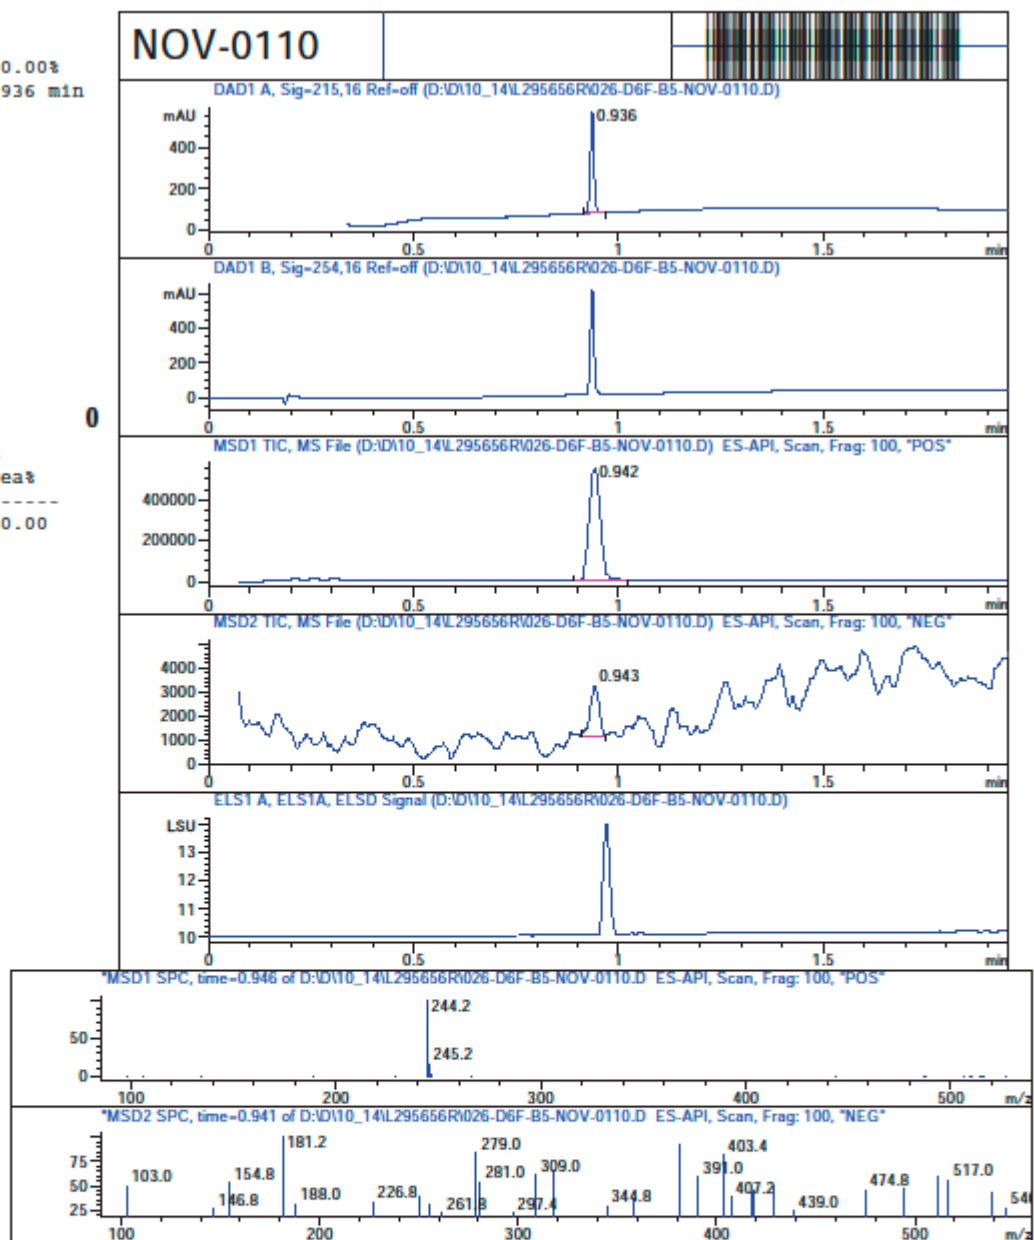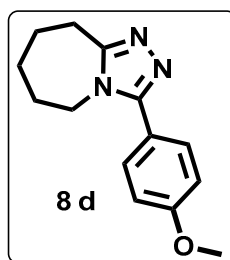

Molecular Weight:  
243,31

Figure S12. LC-MS spectrum of compound **8d**

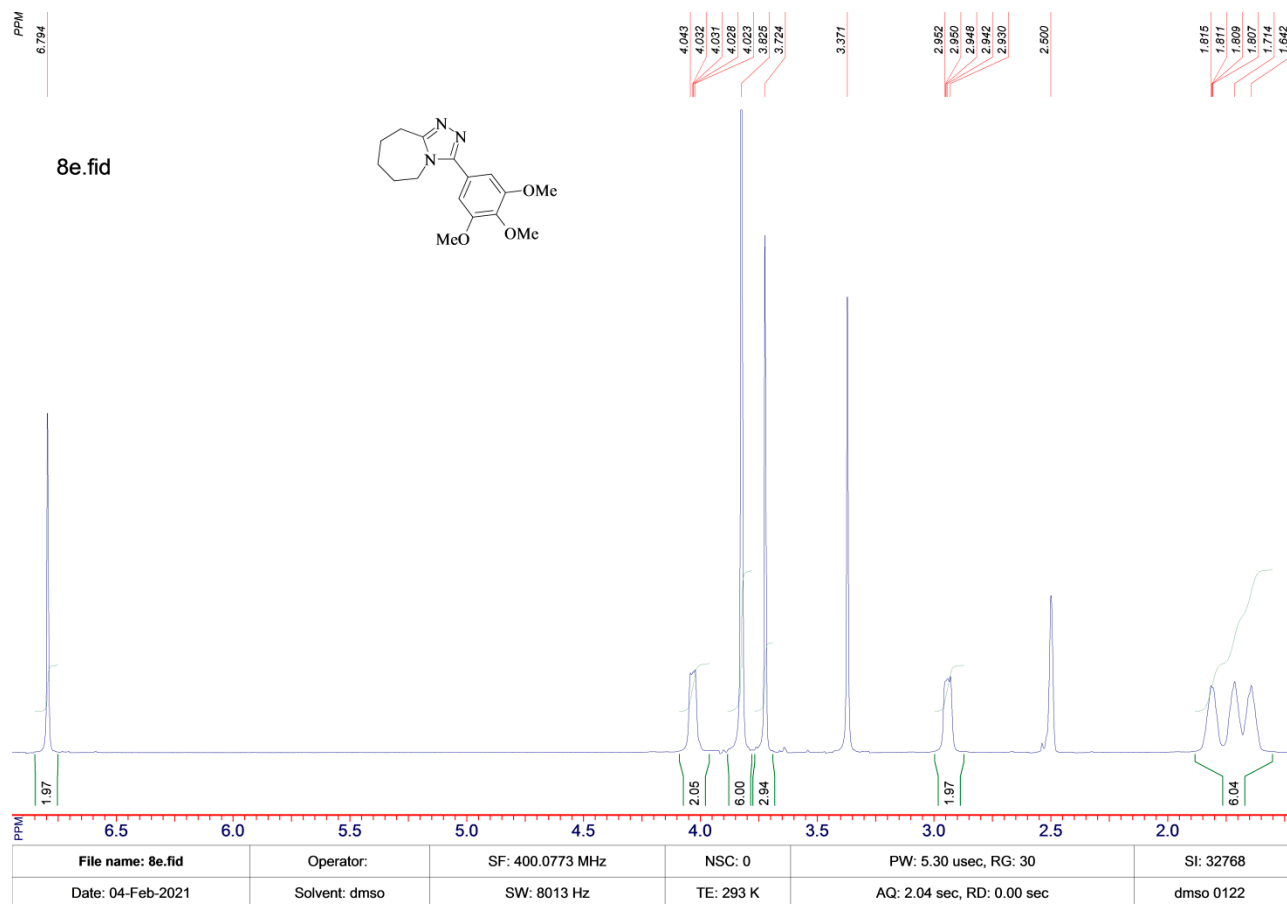

Figure S13.  $^1\text{H}$  NMR spectrum of compound **8e**

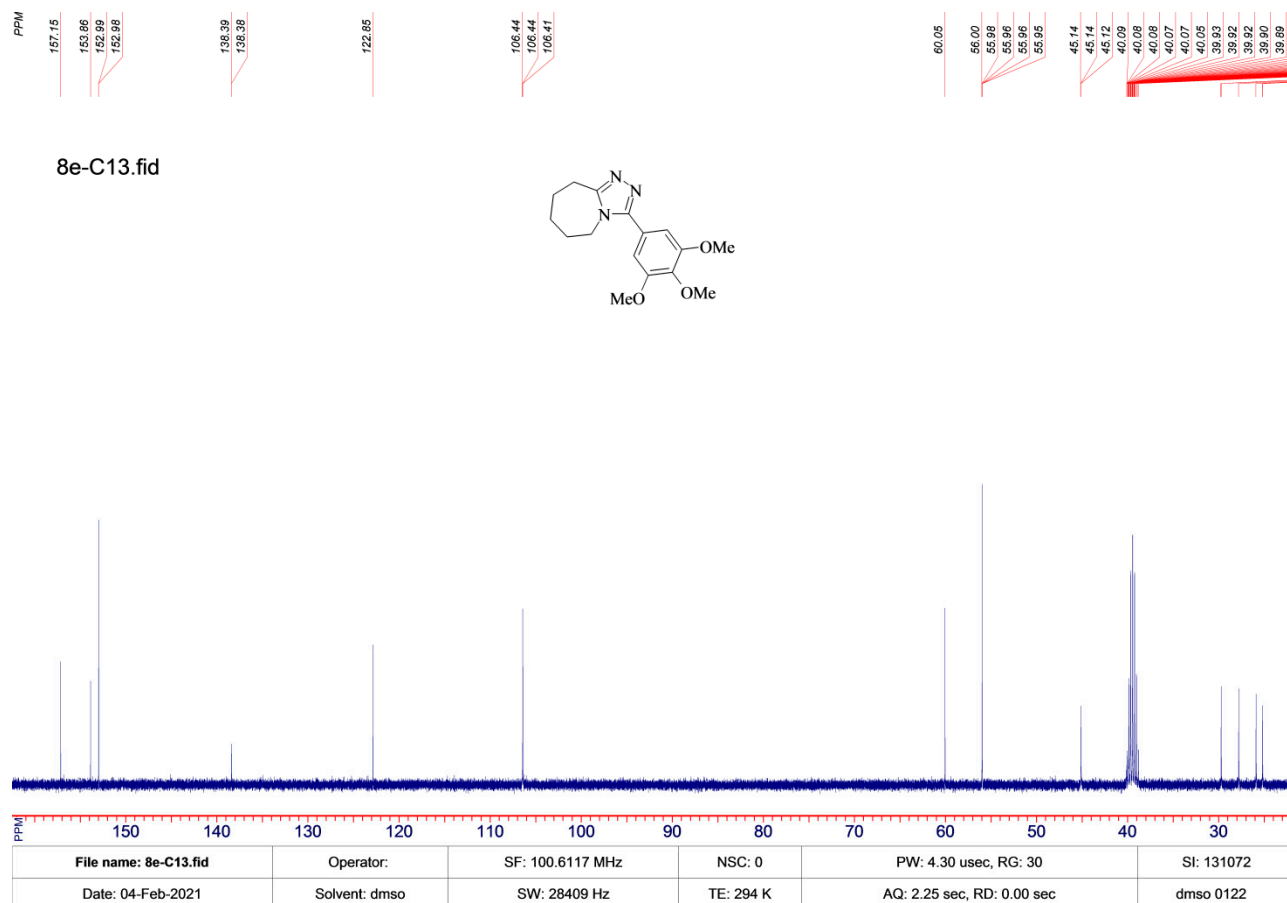

Figure S14.  $^{13}\text{C}$  NMR spectrum of compound **8e**

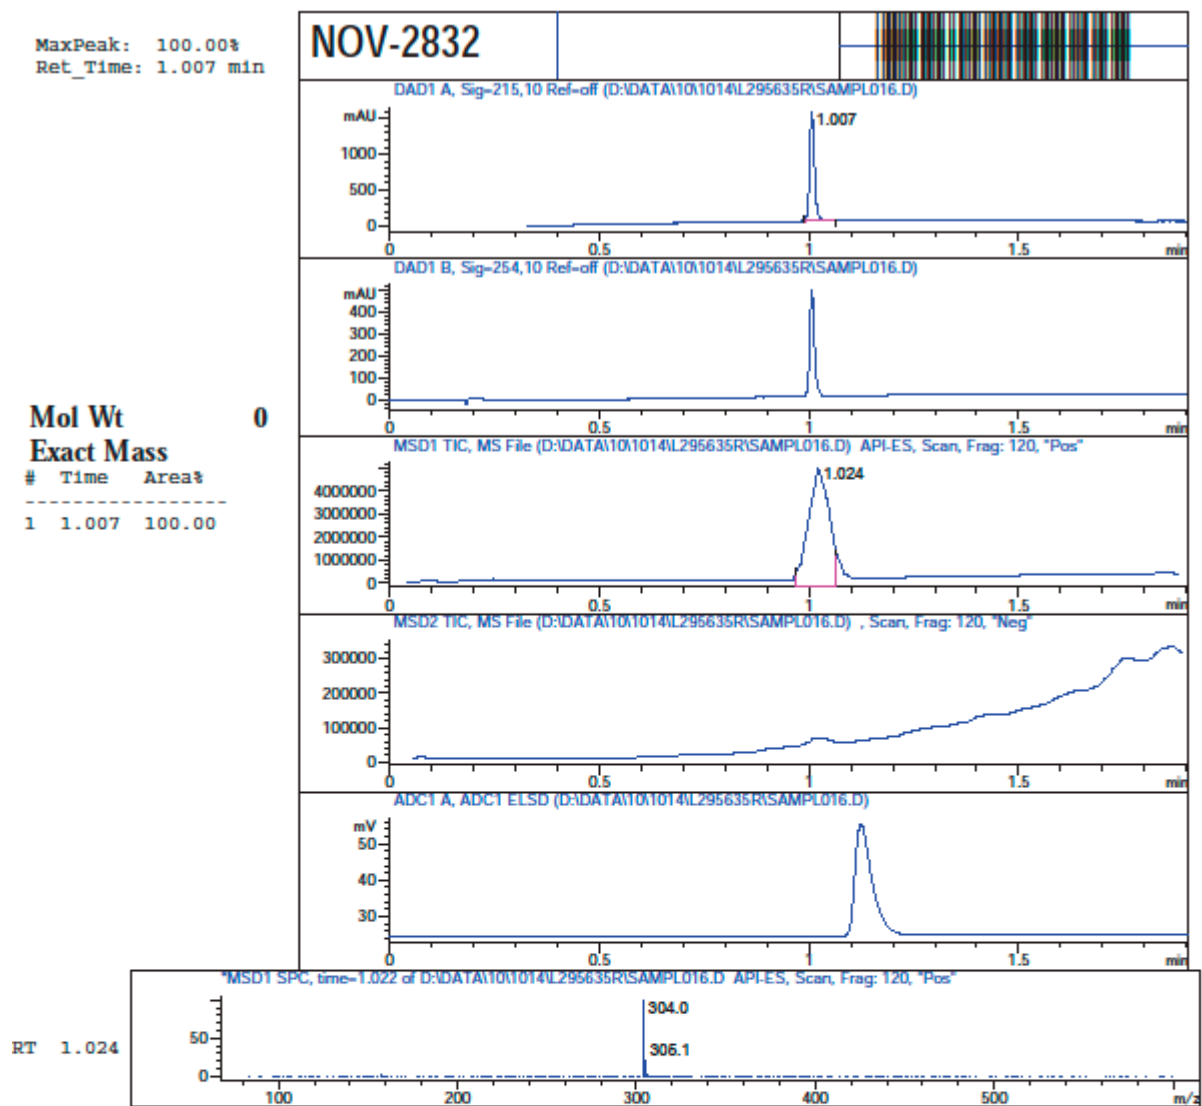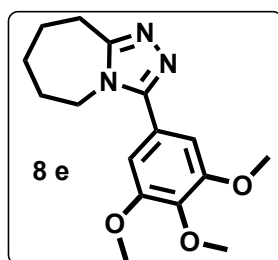

Molecular Weight: 303,36

Figure S15. LC-MS spectrum of compound **8e**

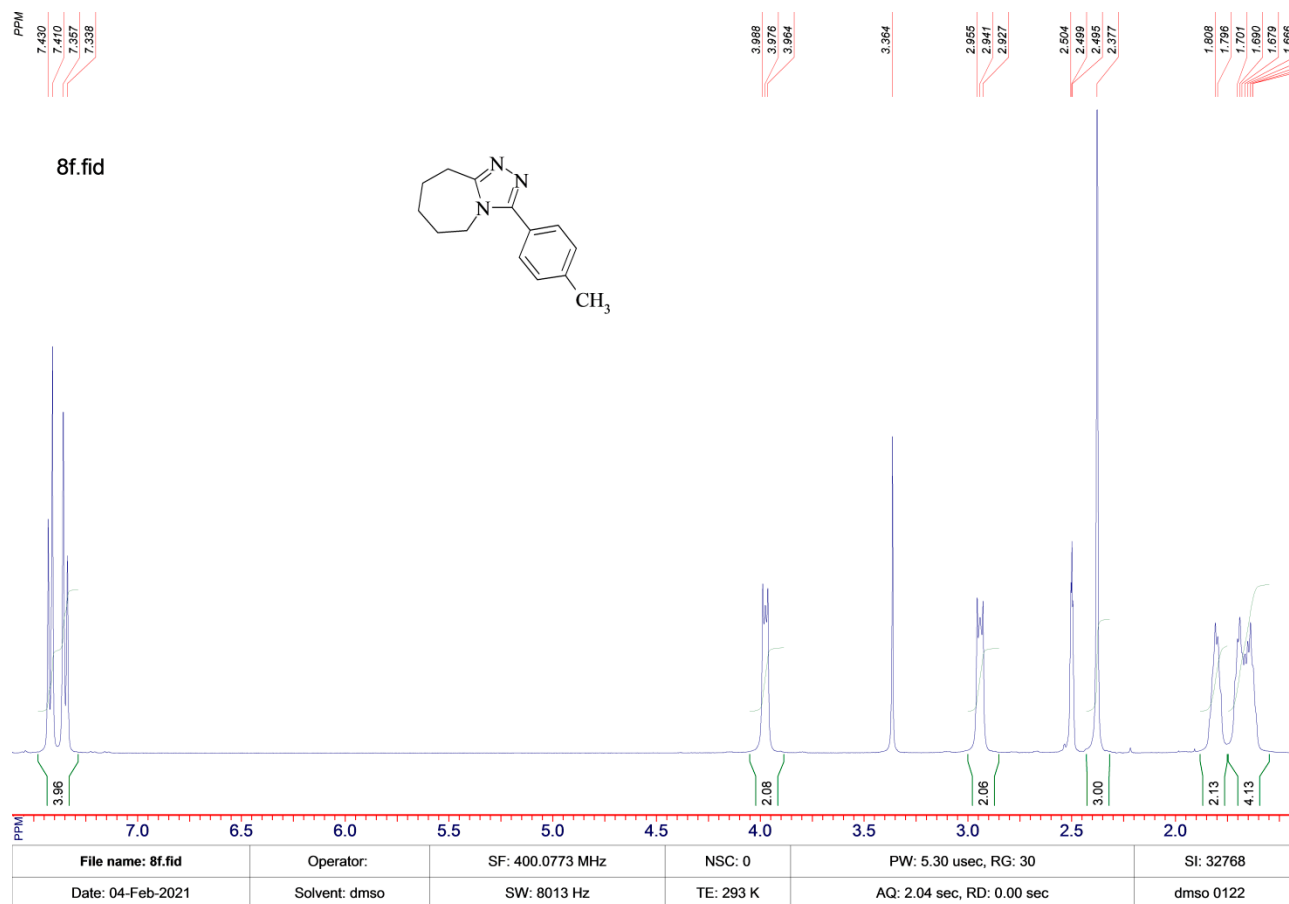

Figure S16.  $^1\text{H}$  NMR spectrum of compound **8f**

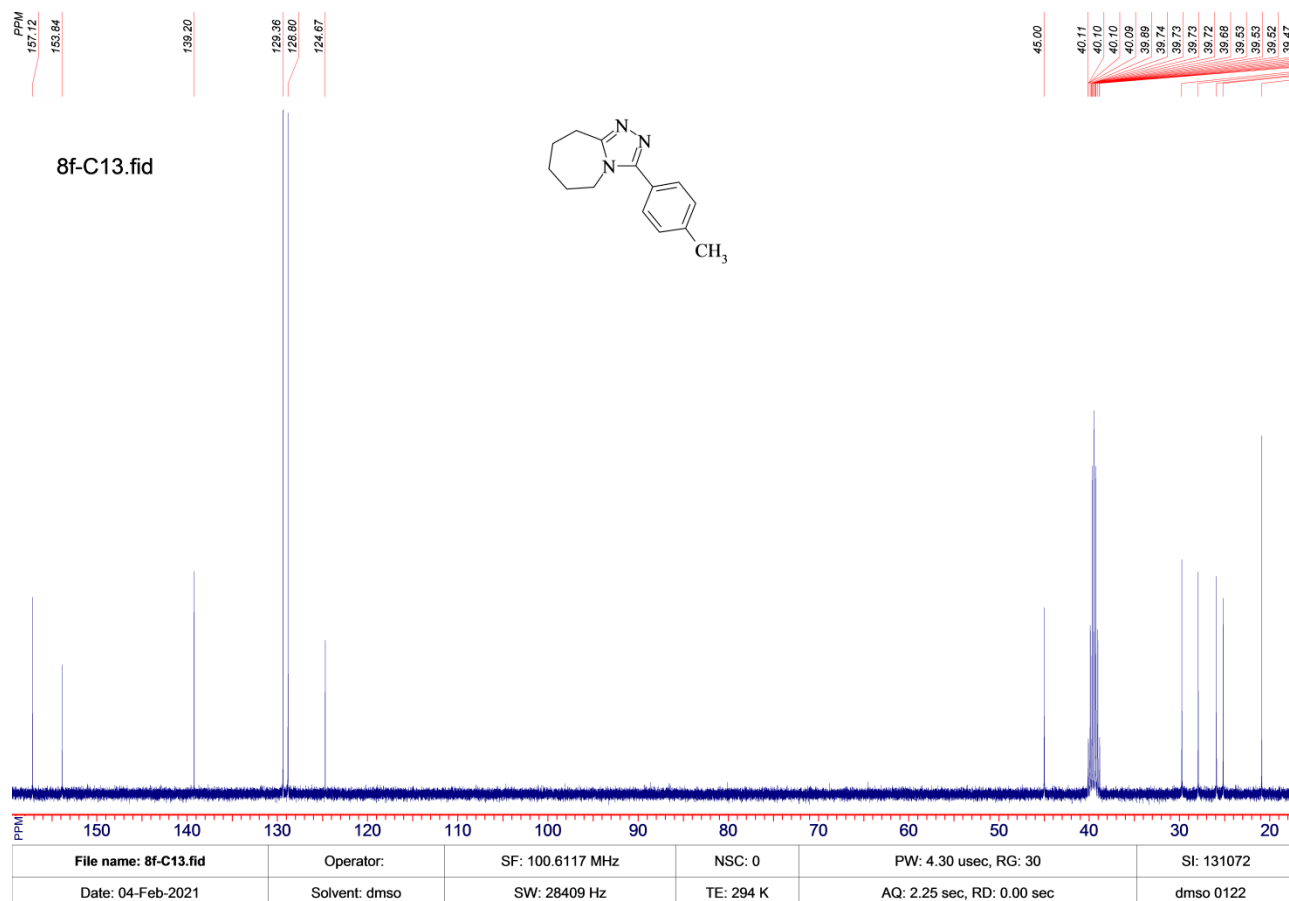

Figure S17.  $^{13}\text{C}$  NMR spectrum of compound **8f**

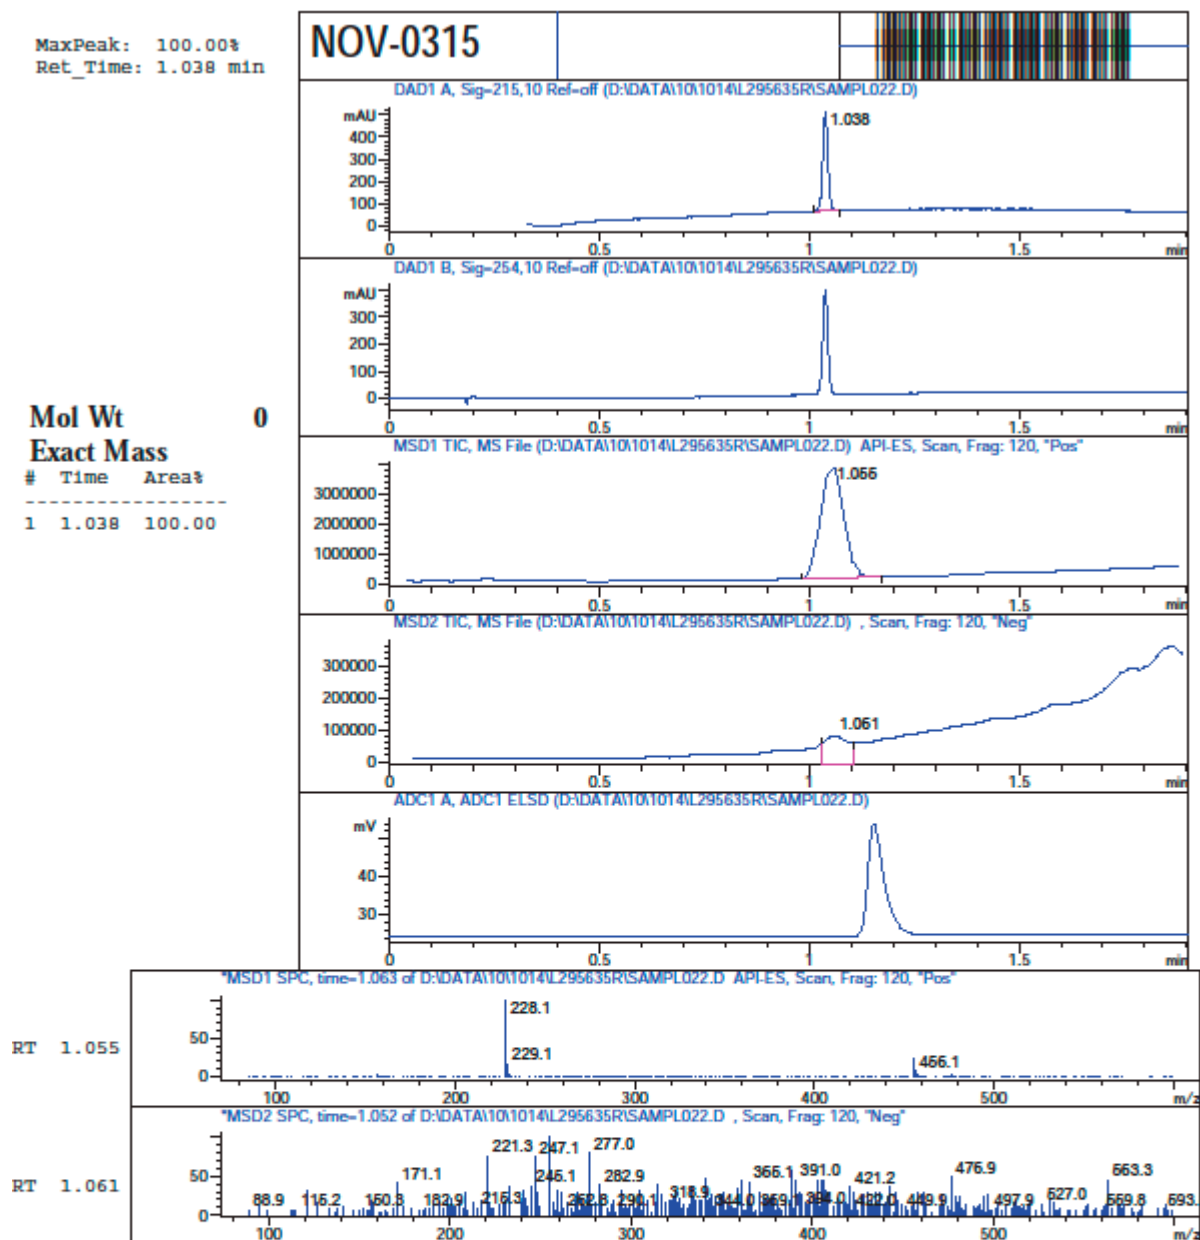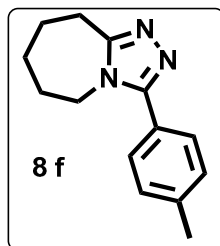

Molecular Weight:  
227,31

Figure S18. LC-MS spectrum of compound **8f**

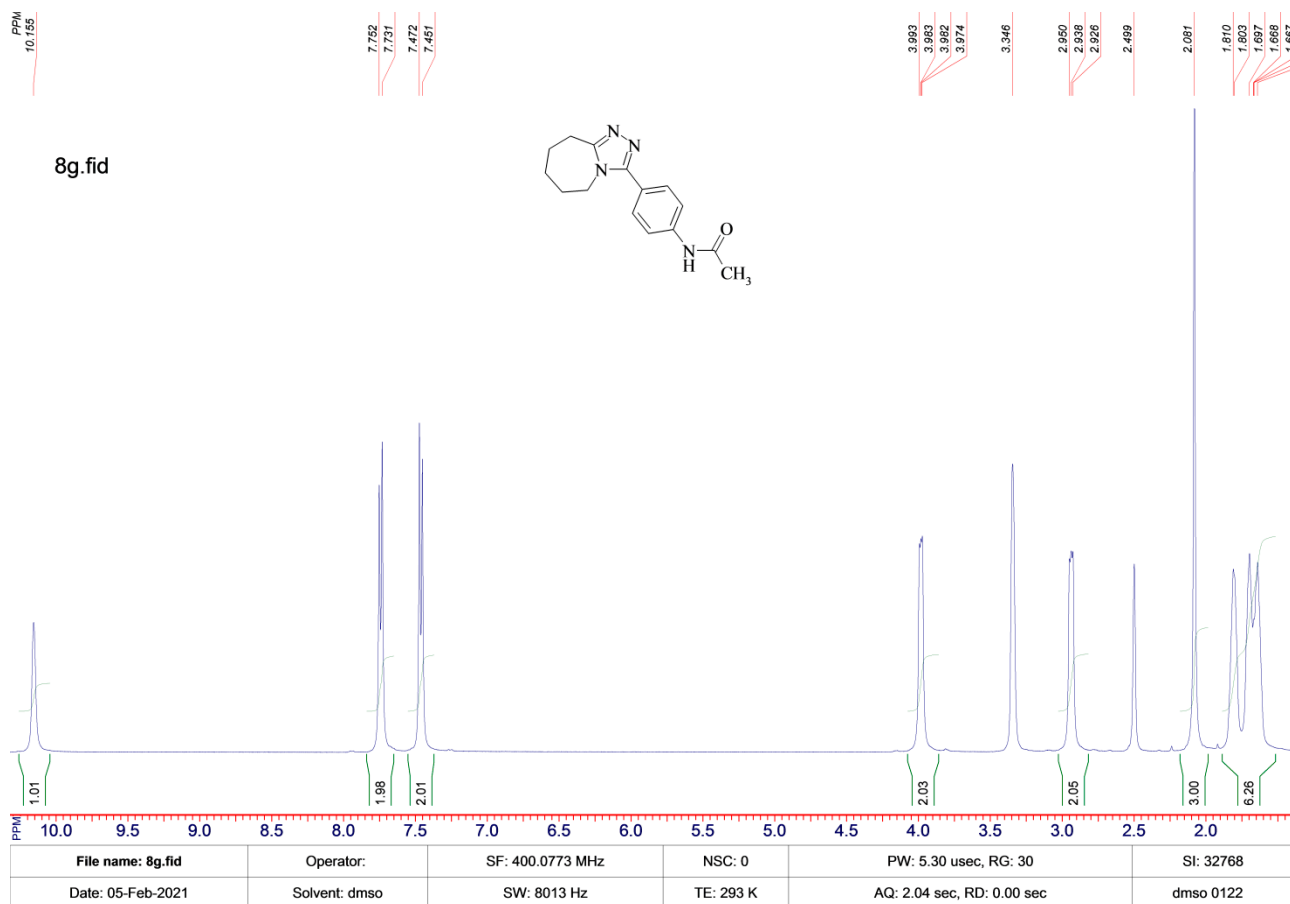

Figure S19.  $^1\text{H}$  NMR spectrum of compound **8g**

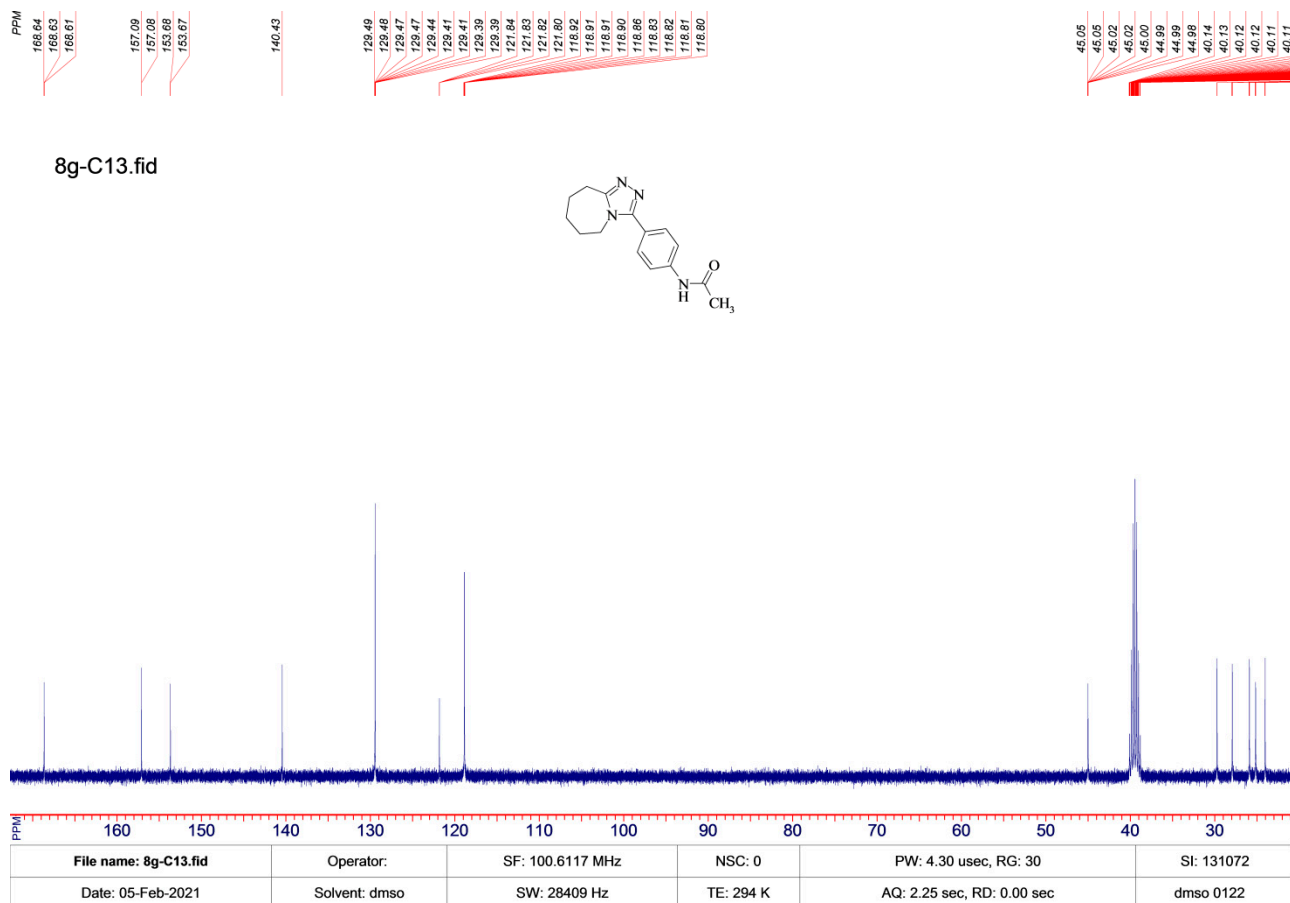

Figure S20.  $^{13}\text{C}$  NMR spectrum of compound **8g**

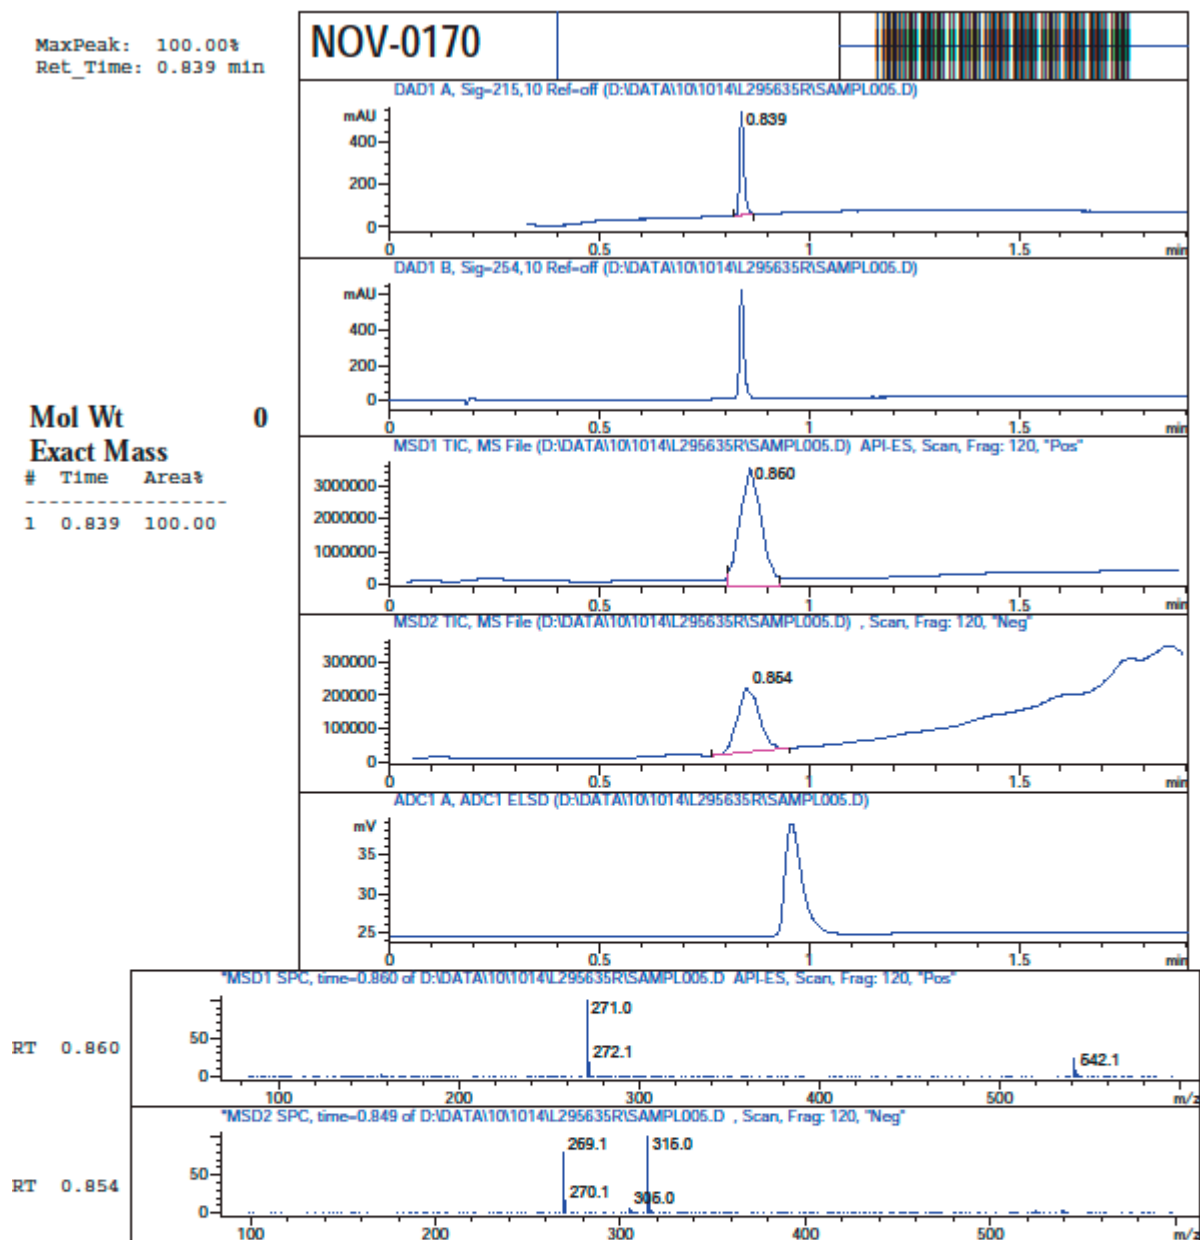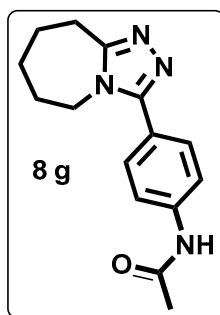

Molecular Weight:  
270,34

Figure S21. LC-MS spectrum of compound **8g**
